# Supplementary material
Source: HighWire-hosted journal article supplement (https://bmjopen.bmj.com/content/8/2/e018742)
Supplement: inline-supplementary-material-2 [file inline-supplementary-material-2.pdf]

| Place participant barcode here | FOOD - DAY 1                                                    |                                                               | DRINK – DAY 1 |                                                                       |
|--------------------------------|-----------------------------------------------------------------|---------------------------------------------------------------|---------------|-----------------------------------------------------------------------|
| Contents of meal               | Was food packaged in plastic known or suspected to contain BPA? | Was food cooked in plastic known or suspected to contain BPA? | Type of Drink | Packaging (please describe) e.g. canned, plastic (Δ number), tetrapak |
| <b>Breakfast:</b>              |                                                                 |                                                               |               |                                                                       |
| 1.                             |                                                                 |                                                               |               |                                                                       |
| 2.                             |                                                                 |                                                               |               |                                                                       |
| 3.                             |                                                                 |                                                               |               |                                                                       |
| 4.                             |                                                                 |                                                               |               |                                                                       |
| 5.                             |                                                                 |                                                               |               |                                                                       |
| <b>Lunch:</b>                  |                                                                 |                                                               |               |                                                                       |
| 1.                             |                                                                 |                                                               |               |                                                                       |
| 2.                             |                                                                 |                                                               |               |                                                                       |
| 3.                             |                                                                 |                                                               |               |                                                                       |
| 4.                             |                                                                 |                                                               |               |                                                                       |
| 5.                             |                                                                 |                                                               |               |                                                                       |
| <b>Dinner:</b>                 |                                                                 |                                                               |               |                                                                       |
| 1.                             |                                                                 |                                                               |               |                                                                       |
| 2.                             |                                                                 |                                                               |               |                                                                       |
| 3.                             |                                                                 |                                                               |               |                                                                       |
| 4.                             |                                                                 |                                                               |               |                                                                       |
| 5.                             |                                                                 |                                                               |               |                                                                       |
| <b>Snacks:</b>                 |                                                                 |                                                               |               |                                                                       |
| 1.                             |                                                                 |                                                               |               |                                                                       |
| 2.                             |                                                                 |                                                               |               |                                                                       |
| 3.                             |                                                                 |                                                               |               |                                                                       |
| 4.                             |                                                                 |                                                               |               |                                                                       |

| Place participant barcode here | FOOD - DAY 2                                                    |                                                               | DRINK – DAY 2 |                                                                       |
|--------------------------------|-----------------------------------------------------------------|---------------------------------------------------------------|---------------|-----------------------------------------------------------------------|
| Contents of meal               | Was food packaged in plastic known or suspected to contain BPA? | Was food cooked in plastic known or suspected to contain BPA? | Type of Drink | Packaging (please describe) e.g. canned, plastic (Δ number), tetrapak |
| <b>Breakfast:</b>              |                                                                 |                                                               |               |                                                                       |
| 1.                             |                                                                 |                                                               |               |                                                                       |
| 2.                             |                                                                 |                                                               |               |                                                                       |
| 3.                             |                                                                 |                                                               |               |                                                                       |
| 4.                             |                                                                 |                                                               |               |                                                                       |
| 5.                             |                                                                 |                                                               |               |                                                                       |
| <b>Lunch:</b>                  |                                                                 |                                                               |               |                                                                       |
| 1.                             |                                                                 |                                                               |               |                                                                       |
| 2.                             |                                                                 |                                                               |               |                                                                       |
| 3.                             |                                                                 |                                                               |               |                                                                       |
| 4.                             |                                                                 |                                                               |               |                                                                       |
| 5.                             |                                                                 |                                                               |               |                                                                       |
| <b>Dinner:</b>                 |                                                                 |                                                               |               |                                                                       |
| 1.                             |                                                                 |                                                               |               |                                                                       |
| 2.                             |                                                                 |                                                               |               |                                                                       |
| 3.                             |                                                                 |                                                               |               |                                                                       |
| 4.                             |                                                                 |                                                               |               |                                                                       |
| 5.                             |                                                                 |                                                               |               |                                                                       |
| <b>Snacks:</b>                 |                                                                 |                                                               |               |                                                                       |
| 1.                             |                                                                 |                                                               |               |                                                                       |
| 2.                             |                                                                 |                                                               |               |                                                                       |
| 3.                             |                                                                 |                                                               |               |                                                                       |
| 4.                             |                                                                 |                                                               |               |                                                                       |

| Place participant barcode here | FOOD - DAY 3                                                    |                                                               | DRINK – DAY 3 |                                                                       |
|--------------------------------|-----------------------------------------------------------------|---------------------------------------------------------------|---------------|-----------------------------------------------------------------------|
| Contents of meal               | Was food packaged in plastic known or suspected to contain BPA? | Was food cooked in plastic known or suspected to contain BPA? | Type of Drink | Packaging (please describe) e.g. canned, plastic (Δ number), tetrapak |
| <b>Breakfast:</b>              |                                                                 |                                                               |               |                                                                       |
| 1.                             |                                                                 |                                                               |               |                                                                       |
| 2.                             |                                                                 |                                                               |               |                                                                       |
| 3.                             |                                                                 |                                                               |               |                                                                       |
| 4.                             |                                                                 |                                                               |               |                                                                       |
| 5.                             |                                                                 |                                                               |               |                                                                       |
| <b>Lunch:</b>                  |                                                                 |                                                               |               |                                                                       |
| 1.                             |                                                                 |                                                               |               |                                                                       |
| 2.                             |                                                                 |                                                               |               |                                                                       |
| 3.                             |                                                                 |                                                               |               |                                                                       |
| 4.                             |                                                                 |                                                               |               |                                                                       |
| 5.                             |                                                                 |                                                               |               |                                                                       |
| <b>Dinner:</b>                 |                                                                 |                                                               |               |                                                                       |
| 1.                             |                                                                 |                                                               |               |                                                                       |
| 2.                             |                                                                 |                                                               |               |                                                                       |
| 3.                             |                                                                 |                                                               |               |                                                                       |
| 4.                             |                                                                 |                                                               |               |                                                                       |
| 5.                             |                                                                 |                                                               |               |                                                                       |
| <b>Snacks:</b>                 |                                                                 |                                                               |               |                                                                       |
| 1.                             |                                                                 |                                                               |               |                                                                       |
| 2.                             |                                                                 |                                                               |               |                                                                       |
| 3.                             |                                                                 |                                                               |               |                                                                       |
| 4.                             |                                                                 |                                                               |               |                                                                       |

| Place participant barcode here | FOOD - DAY 4                                                    |                                                               | DRINK – DAY 4 |                                                                       |
|--------------------------------|-----------------------------------------------------------------|---------------------------------------------------------------|---------------|-----------------------------------------------------------------------|
| Contents of meal               | Was food packaged in plastic known or suspected to contain BPA? | Was food cooked in plastic known or suspected to contain BPA? | Type of Drink | Packaging (please describe) e.g. canned, plastic (Δ number), tetrapak |
| <b>Breakfast:</b>              |                                                                 |                                                               |               |                                                                       |
| 1.                             |                                                                 |                                                               |               |                                                                       |
| 2.                             |                                                                 |                                                               |               |                                                                       |
| 3.                             |                                                                 |                                                               |               |                                                                       |
| 4.                             |                                                                 |                                                               |               |                                                                       |
| 5.                             |                                                                 |                                                               |               |                                                                       |
| <b>Lunch:</b>                  |                                                                 |                                                               |               |                                                                       |
| 1.                             |                                                                 |                                                               |               |                                                                       |
| 2.                             |                                                                 |                                                               |               |                                                                       |
| 3.                             |                                                                 |                                                               |               |                                                                       |
| 4.                             |                                                                 |                                                               |               |                                                                       |
| 5.                             |                                                                 |                                                               |               |                                                                       |
| <b>Dinner:</b>                 |                                                                 |                                                               |               |                                                                       |
| 1.                             |                                                                 |                                                               |               |                                                                       |
| 2.                             |                                                                 |                                                               |               |                                                                       |
| 3.                             |                                                                 |                                                               |               |                                                                       |
| 4.                             |                                                                 |                                                               |               |                                                                       |
| 5.                             |                                                                 |                                                               |               |                                                                       |
| <b>Snacks:</b>                 |                                                                 |                                                               |               |                                                                       |
| 1.                             |                                                                 |                                                               |               |                                                                       |
| 2.                             |                                                                 |                                                               |               |                                                                       |
| 3.                             |                                                                 |                                                               |               |                                                                       |
| 4.                             |                                                                 |                                                               |               |                                                                       |

| Place participant barcode here | FOOD - DAY 5                                                    |                                                               | DRINK – DAY 5 |                                                                       |
|--------------------------------|-----------------------------------------------------------------|---------------------------------------------------------------|---------------|-----------------------------------------------------------------------|
| Contents of meal               | Was food packaged in plastic known or suspected to contain BPA? | Was food cooked in plastic known or suspected to contain BPA? | Type of Drink | Packaging (please describe) e.g. canned, plastic (Δ number), tetrapak |
| <b>Breakfast:</b>              |                                                                 |                                                               |               |                                                                       |
| 1.                             |                                                                 |                                                               |               |                                                                       |
| 2.                             |                                                                 |                                                               |               |                                                                       |
| 3.                             |                                                                 |                                                               |               |                                                                       |
| 4.                             |                                                                 |                                                               |               |                                                                       |
| 5.                             |                                                                 |                                                               |               |                                                                       |
| <b>Lunch:</b>                  |                                                                 |                                                               |               |                                                                       |
| 1.                             |                                                                 |                                                               |               |                                                                       |
| 2.                             |                                                                 |                                                               |               |                                                                       |
| 3.                             |                                                                 |                                                               |               |                                                                       |
| 4.                             |                                                                 |                                                               |               |                                                                       |
| 5.                             |                                                                 |                                                               |               |                                                                       |
| <b>Dinner:</b>                 |                                                                 |                                                               |               |                                                                       |
| 1.                             |                                                                 |                                                               |               |                                                                       |
| 2.                             |                                                                 |                                                               |               |                                                                       |
| 3.                             |                                                                 |                                                               |               |                                                                       |
| 4.                             |                                                                 |                                                               |               |                                                                       |
| 5.                             |                                                                 |                                                               |               |                                                                       |
| <b>Snacks:</b>                 |                                                                 |                                                               |               |                                                                       |
| 1.                             |                                                                 |                                                               |               |                                                                       |
| 2.                             |                                                                 |                                                               |               |                                                                       |
| 3.                             |                                                                 |                                                               |               |                                                                       |
| 4.                             |                                                                 |                                                               |               |                                                                       |

| Place participant barcode here | FOOD - DAY 6                                                    |                                                               | DRINK – DAY 6 |                                                                       |
|--------------------------------|-----------------------------------------------------------------|---------------------------------------------------------------|---------------|-----------------------------------------------------------------------|
| Contents of meal               | Was food packaged in plastic known or suspected to contain BPA? | Was food cooked in plastic known or suspected to contain BPA? | Type of Drink | Packaging (please describe) e.g. canned, plastic (Δ number), tetrapak |
| <b>Breakfast:</b>              |                                                                 |                                                               |               |                                                                       |
| 1.                             |                                                                 |                                                               |               |                                                                       |
| 2.                             |                                                                 |                                                               |               |                                                                       |
| 3.                             |                                                                 |                                                               |               |                                                                       |
| 4.                             |                                                                 |                                                               |               |                                                                       |
| 5.                             |                                                                 |                                                               |               |                                                                       |
| <b>Lunch:</b>                  |                                                                 |                                                               |               |                                                                       |
| 1.                             |                                                                 |                                                               |               |                                                                       |
| 2.                             |                                                                 |                                                               |               |                                                                       |
| 3.                             |                                                                 |                                                               |               |                                                                       |
| 4.                             |                                                                 |                                                               |               |                                                                       |
| 5.                             |                                                                 |                                                               |               |                                                                       |
| <b>Dinner:</b>                 |                                                                 |                                                               |               |                                                                       |
| 1.                             |                                                                 |                                                               |               |                                                                       |
| 2.                             |                                                                 |                                                               |               |                                                                       |
| 3.                             |                                                                 |                                                               |               |                                                                       |
| 4.                             |                                                                 |                                                               |               |                                                                       |
| 5.                             |                                                                 |                                                               |               |                                                                       |
| <b>Snacks:</b>                 |                                                                 |                                                               |               |                                                                       |
| 1.                             |                                                                 |                                                               |               |                                                                       |
| 2.                             |                                                                 |                                                               |               |                                                                       |
| 3.                             |                                                                 |                                                               |               |                                                                       |
| 4.                             |                                                                 |                                                               |               |                                                                       |

| Place participant barcode here | FOOD - DAY 7                                                    |                                                               | DRINK – DAY 7 |                                                                       |
|--------------------------------|-----------------------------------------------------------------|---------------------------------------------------------------|---------------|-----------------------------------------------------------------------|
| Contents of meal               | Was food packaged in plastic known or suspected to contain BPA? | Was food cooked in plastic known or suspected to contain BPA? | Type of Drink | Packaging (please describe) e.g. canned, plastic (Δ number), tetrapak |
| <b>Breakfast:</b>              |                                                                 |                                                               |               |                                                                       |
| 1.                             |                                                                 |                                                               |               |                                                                       |
| 2.                             |                                                                 |                                                               |               |                                                                       |
| 3.                             |                                                                 |                                                               |               |                                                                       |
| 4.                             |                                                                 |                                                               |               |                                                                       |
| 5.                             |                                                                 |                                                               |               |                                                                       |
| <b>Lunch:</b>                  |                                                                 |                                                               |               |                                                                       |
| 1.                             |                                                                 |                                                               |               |                                                                       |
| 2.                             |                                                                 |                                                               |               |                                                                       |
| 3.                             |                                                                 |                                                               |               |                                                                       |
| 4.                             |                                                                 |                                                               |               |                                                                       |
| 5.                             |                                                                 |                                                               |               |                                                                       |
| <b>Dinner:</b>                 |                                                                 |                                                               |               |                                                                       |
| 1.                             |                                                                 |                                                               |               |                                                                       |
| 2.                             |                                                                 |                                                               |               |                                                                       |
| 3.                             |                                                                 |                                                               |               |                                                                       |
| 4.                             |                                                                 |                                                               |               |                                                                       |
| 5.                             |                                                                 |                                                               |               |                                                                       |
| <b>Snacks:</b>                 |                                                                 |                                                               |               |                                                                       |
| 1.                             |                                                                 |                                                               |               |                                                                       |
| 2.                             |                                                                 |                                                               |               |                                                                       |
| 3.                             |                                                                 |                                                               |               |                                                                       |
| 4.                             |                                                                 |                                                               |               |                                                                       |

**Participant barcode**

**Additional study information.**

*Please do not feel obliged to answer these questions if you are uncomfortable doing so.*

**Gender**

- Female
- Male
- Prefer not to say

**Tobacco Usage** – Have you used tobacco over the past week

- Yes
- If so, what type and how much? \_\_\_\_\_
- No
  - Prefer not to say

**Alcohol Usage** – Have you used alcohol over the past week

- Yes
- If so, what type and how much? \_\_\_\_\_
- No
  - Prefer not to say

**Medication**- Have you taken any medication over the last week?

- Yes
- No
- Prefer not to say

If so, Please name the medication \_\_\_\_\_  Prefer not to say

**Vegetarian/vegan diet** - Have you eaten or drank any soya products over the past week?

- Yes
- No
- Prefer not to say

**Your measurements** - leave blank if you prefer not to say

Your height \_\_\_\_\_

Your weight \_\_\_\_\_
