# Supplementary material
Source: HighWire-hosted journal article supplement (https://bmjopen.bmj.com/content/8/2/e018742)
Supplement: inline-supplementary-material-3 [file inline-supplementary-material-3.pdf]

**Supplementary information file 3. Example daily diet diary.** A score of 1 is given to each item containing suspected to contain BPA or be packaged in BPA-containing materials. Highly processed foods are also scored as 1, due to uncertainties in the processing procedures. The daily totals are summed to produce a BPA risk score for the 7 day intervention.

|                  | <b>Item</b>              | <b>Packaging</b>     | <b>Score</b> |
|------------------|--------------------------|----------------------|--------------|
| <b>Breakfast</b> |                          |                      |              |
|                  | Homemade pancakes        | None                 | 0            |
|                  | Sugar                    | None                 | 0            |
|                  | lemon                    | None                 | 0            |
|                  | milk                     | HDPE                 | 0            |
| <b>Lunch</b>     |                          |                      |              |
|                  | Homemade Cheese sandwich | none                 | 0            |
|                  | Homemade sultana cake    | none                 | 0            |
|                  | water                    | glass                | 0            |
| <b>Dinner</b>    |                          |                      |              |
|                  | Homemade omelette        | none                 | 0            |
|                  | Sweetcorn                | Can                  | 1            |
|                  | Rice                     | Cellophane           | 0            |
|                  | Tomatoes                 | none                 | 0            |
|                  | water                    | glass                | 0            |
| <b>Snacks</b>    |                          |                      |              |
|                  | Crisps (processed)       | Cellophane           | 1            |
|                  | Apple                    | none                 | 0            |
|                  | milk                     | HDPE                 | 0            |
|                  |                          |                      |              |
|                  |                          | <b>Total for day</b> | <b>2</b>     |
